# Supplementary material for: Optically sensed, molecular shuttles driven by acid–base chemistry
Source: Royal Society of Chemistry journal article supplement (doi:10.1039/b710708k), 2007-01-01
Supplement: b710708k.pdf [file b710708k.pdf]

## Electronic Supplementary Information for:

### Optically sensed, molecular shuttles driven by acid-base chemistry

Sarah J. Vella, Jorge Tiburcio and Stephen J. Loeb\*

#### Synthesis of 4-Pyridyl-4-aniline

4-(4,4,5,5-Tetramethyl-1,3,2-dioxaborolan-2-yl)aniline (5.00 g,  $2.28 \times 10^{-2}$  mol), 4-bromopyridine hydrochloride (4.44 g,  $2.28 \times 10^{-2}$  mol) and sodium carbonate ( $12.10$  g,  $1.14 \times 10^{-1}$  mol) were dissolved in DMF (200 mL) and H<sub>2</sub>O (100 mL) and degassed with N<sub>2</sub>(g) for 2 h. Tetrakis(triphenylphosphine)palladium(0) (1.32 g,  $1.14 \times 10^{-4}$  mol) was added and the solution degassed for an additional 1 h. The reaction was refluxed for 24 h and subsequently cooled to room temperature. The DMF and H<sub>2</sub>O were removed by rotary evaporation. The resulting residue was dissolved in CH<sub>2</sub>Cl<sub>2</sub> (100 mL) and washed with H<sub>2</sub>O (3 x 100 mL). The CH<sub>2</sub>Cl<sub>2</sub> was dried with anhydrous MgSO<sub>4</sub>, filtered and concentrated. The product precipitated from CH<sub>2</sub>Cl<sub>2</sub> as a pale yellow powder. (1.15 g, 80%)

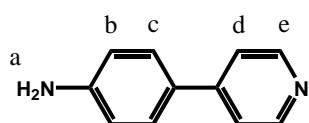

<sup>1</sup>H NMR Spectroscopic Data (CDCl<sub>3</sub>)

| Proton | $\delta$ (ppm) | Multiplicity | # Protons | <i>J</i> (Hz)                       |
|--------|----------------|--------------|-----------|-------------------------------------|
| a      | 3.88           | br, s        | 2         | --                                  |
| b      | 6.76           | d            | 2         | <sup>3</sup> J <sub>bc</sub> = 8.42 |
| c      | 7.49           | d            | 2         | <sup>3</sup> J <sub>cb</sub> = 8.42 |
| d      | 7.44           | d            | 2         | <sup>3</sup> J <sub>de</sub> = 6.08 |
| e      | 8.57           | d            | 2         | <sup>3</sup> J <sub>ed</sub> = 6.08 |

<sup>1</sup>H NMR Spectroscopic Data (CD<sub>3</sub>CN)

| Proton | δ (ppm) | Multiplicity | # Protons | J (Hz)                              |
|--------|---------|--------------|-----------|-------------------------------------|
| a      | 4.43    | br s         | 2         | --                                  |
| b      | 6.73    | d            | 2         | <sup>3</sup> J <sub>bc</sub> = 8.43 |
| c      | 7.52    | d            | 2         | <sup>3</sup> J <sub>cb</sub> = 8.43 |
| d      | 7.50    | d            | 2         | <sup>3</sup> J <sub>de</sub> = 5.76 |
| e      | 8.50    | d            | 2         | <sup>3</sup> J <sub>ed</sub> = 5.76 |

Synthesis of 1[OTf]

4-Pyridyl-4-aniline (1.00 g, 5.88 × 10<sup>-3</sup> mol) was refluxed in 1,2-dibromoethane (40 mL) and ethanol (20 mL) for 6 h. The precipitate that formed was collected by vacuum filtration. The precipitate was stirred in CH<sub>2</sub>Cl<sub>2</sub> and filtered. This afforded a yellow solid as the bromide salt (0.921 g, 44%) The bromide salt was anion exchanged to the triflate salt by dissolving the solid in H<sub>2</sub>O, warming the solution and adding sodium triflate, [Na][CF<sub>3</sub>SO<sub>3</sub>]. The solution was cooled and the yellow crystals were collected by vacuum filtration. (1.05 g, 96%)

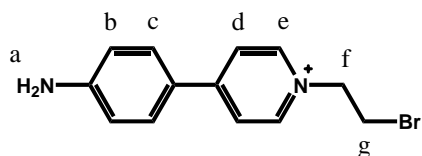

<sup>1</sup>H NMR Spectroscopic Data (D<sub>2</sub>O, as Br salt)

| Proton | δ (ppm) | Multiplicity | # Protons | J (Hz)                              |
|--------|---------|--------------|-----------|-------------------------------------|
| a      | --      | --           | 2         | --                                  |
| b      | 6.81    | d            | 2         | <sup>3</sup> J <sub>bc</sub> = 8.69 |
| c      | 7.71    | d            | 2         | <sup>3</sup> J <sub>cb</sub> = 8.69 |
| d      | 8.03    | d            | 2         | <sup>3</sup> J <sub>de</sub> = 6.86 |
| e      | 8.50    | d            | 2         | <sup>3</sup> J <sub>ed</sub> = 6.86 |
| f      | 4.76    | t            | 2         | <sup>3</sup> J <sub>fg</sub> = 5.70 |
| g      | 3.83    | t            | 2         | <sup>3</sup> J <sub>gf</sub> = 5.70 |

<sup>1</sup>H NMR Spectroscopic Data (CD<sub>3</sub>CN, as OTf salt)

| Proton | δ (ppm) | Multiplicity | # Protons | J (Hz)                              |
|--------|---------|--------------|-----------|-------------------------------------|
| a      | 5.12    | br s         | 2         | --                                  |
| b      | 6.79    | d            | 2         | <sup>3</sup> J <sub>bc</sub> = 8.71 |
| c      | 7.78    | d            | 2         | <sup>3</sup> J <sub>cb</sub> = 8.71 |
| d      | 8.08    | d            | 2         | <sup>3</sup> J <sub>de</sub> = 6.89 |
| e      | 8.42    | d            | 2         | <sup>3</sup> J <sub>ed</sub> = 6.89 |
| f      | 4.74    | t            | 2         | <sup>3</sup> J <sub>fg</sub> = 5.88 |
| g      | 3.89    | t            | 2         | <sup>3</sup> J <sub>gf</sub> = 5.88 |

### Synthesis of 2[OTf]<sub>2</sub>

Compound 1[OTf] (0.635 g,  $1.49 \times 10^{-3}$  mol) and 3,5-lutidine (0.239 g,  $2.23 \times 10^{-3}$  mol) were dissolved in acetonitrile (25 mL) and refluxed for 24 hours. The precipitate that formed was isolated by vacuum filtration and washed with CH<sub>2</sub>Cl<sub>2</sub>. This yielded the product as a yellow solid as the bromide salt (0.150 g, 21%) The bromide salt was anion exchanged to the triflate salt by dissolving the solid in H<sub>2</sub>O, warming the solution and adding NaOTf. The solution was cooled and the yellow crystals collected by vacuum filtration.

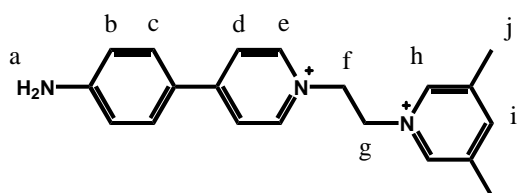

<sup>1</sup>H NMR Spectroscopic Data (D<sub>2</sub>O, as Br salt)

| Proton | δ (ppm) | Multiplicity | # Protons | J (Hz)                              |
|--------|---------|--------------|-----------|-------------------------------------|
| a      | --      | --           | 2         | --                                  |
| b      | 6.80    | d            | 2         | <sup>3</sup> J <sub>bc</sub> = 8.76 |
| c      | 7.71    | d            | 2         | <sup>3</sup> J <sub>cb</sub> = 8.76 |
| d      | 8.01    | d            | 2         | <sup>3</sup> J <sub>de</sub> = 7.02 |

|          |      |   |   |                     |
|----------|------|---|---|---------------------|
| <b>e</b> | 8.27 | d | 2 | ${}^3J_{ed} = 7.02$ |
| <b>f</b> | 5.04 | t | 2 | ${}^3J_{fg} = 5.72$ |
| <b>g</b> | 4.98 | t | 2 | ${}^3J_{gf} = 5.72$ |
| <b>h</b> | 8.31 | s | 2 | --                  |
| <b>i</b> | 8.18 | s | 1 | --                  |
| <b>j</b> | 2.30 | s | 6 | --                  |

${}^1\text{H}$  NMR Spectroscopic Data ( $\text{CD}_3\text{CN}$ , as OTf salt)

| Proton   | $\delta$ (ppm) | Multiplicity | # Protons | $J$ (Hz)            |
|----------|----------------|--------------|-----------|---------------------|
| <b>a</b> | 5.18           | br s         | 2         | --                  |
| <b>b</b> | 6.80           | d            | 2         | ${}^3J_{bc} = 8.80$ |
| <b>c</b> | 7.79           | d            | 2         | ${}^3J_{cb} = 8.80$ |
| <b>d</b> | 8.06           | d            | 2         | ${}^3J_{de} = 7.12$ |
| <b>e</b> | 8.30           | d            | 2         | ${}^3J_{ed} = 7.12$ |
| <b>f</b> | 4.96           | m            | 2         | --                  |
| <b>g</b> | 4.90           | m            | 2         | --                  |
| <b>h</b> | 8.36           | s            | 2         | --                  |
| <b>i</b> | 8.22           | s            | 1         | --                  |
| <b>j</b> | 2.45           | s            | 6         | --                  |

**Synthesis of 3[OTf]<sub>3</sub>**

Compound **2**[Br]<sub>2</sub> (0.200 g,  $4.30 \times 10^{-4}$  mol), **DB24C8** (0.964 g,  $2.14 \times 10^{-3}$  mol) and 3,5-bis(trifluoromethyl)benzylbromide (0.066 g,  $2.15 \times 10^{-4}$  mol) were dissolved in a two layer  $\text{CH}_3\text{NO}_2$  (10 mL) and  $\text{H}_2\text{O}$  (5 mL) solution to which NaOTf (0.150 g,  $8.60 \times 10^{-4}$  mol) was added and this mixture stirred at room temperature for 7 days. The  $\text{CH}_3\text{NO}_2$  layer was separated from the  $\text{H}_2\text{O}$  layer, washed several times with water and dried with anhydrous  $\text{MgSO}_4$ . The  $\text{CH}_3\text{NO}_2$  was evaporated and the residue washed several times with toluene to get rid of excess 3,5-bis(trifluoromethyl)benzylbromide and **DB24C8**. The rotaxane was further purified by column chromatography on silica get using 7:2:1 MeOH: 2M  $\text{NH}_4\text{Cl}$ :  $\text{MeNO}_2$  as the eluent. The

isolated solid was dissolved in  $\text{CH}_3\text{NO}_2$  and NaOTf added. The resulting solid was then washed with water numerous times. The product was isolated as a yellow solid. ( $R_f = 0.82$ , 0.070 g, 26%), ESI-MS:  $m/z$   $[\mathbf{3}\text{-OTf}]^+$  calc. 1128.3721, found 1128.3763. The stoppered axle  $\mathbf{4}[\text{OTf}]_3$  was also isolated from the column. It was dissolved in  $\text{CH}_3\text{NO}_2$  and NaOTf added. The resulting solid was then repeatedly washed with water. The product was isolated as a yellow solid. ( $R_f = 0.64$ , 0.020 g, 7%), ESI-MS:  $m/z$   $[\mathbf{4}\text{-OTf}]^+$  calc. 680.1624, found 680.1634.

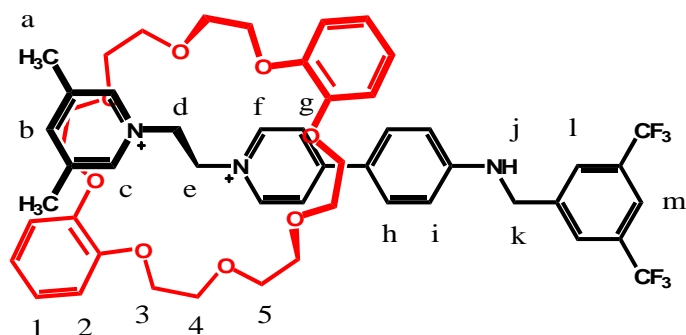

H NMR Spectroscopic Data ( $\text{CD}_3\text{CN}$ )

| Proton     | $\delta$ (ppm) | Multiplicity | # Protons | $J$ (Hz)          |
|------------|----------------|--------------|-----------|-------------------|
| <b>a</b>   | 2.15           | s            | 6         | --                |
| <b>b</b>   | 7.59           | s            | 1         | --                |
| <b>c</b>   | 8.55           | s            | 2         | --                |
| <b>d</b>   | 5.33           | m            | 2         | --                |
| <b>e</b>   | 5.26           | m            | 2         | --                |
| <b>f</b>   | 8.80           | d            | 2         | $^3J_{fg} = 7.01$ |
| <b>g</b>   | 7.84           | d            | 2         | $^3J_{gf} = 7.01$ |
| <b>h</b>   | 7.58           | d            | 2         | $^3J_{hi} = 8.72$ |
| <b>i</b>   | 6.71           | d            | 2         | $^3J_{ih} = 8.72$ |
| <b>j</b>   | 6.13           | t            | 1         | --                |
| <b>k</b>   | 4.63           | d            | 2         | --                |
| <b>l</b>   | 7.97           | s            | 2         | --                |
| <b>m</b>   | 7.93           | s            | 1         | --                |
| <b>1-2</b> | 6.71           | m            | 4         | --                |

3-5

3.85-4.03

m

24

--

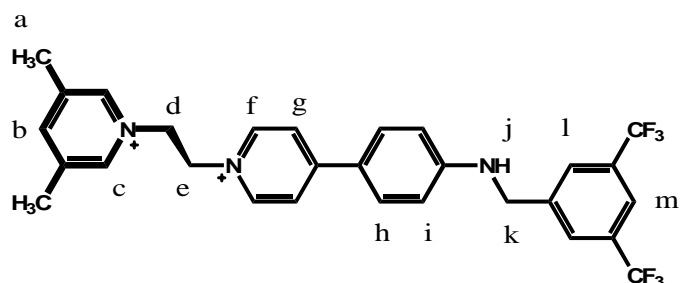

<sup>1</sup>H NMR Spectroscopic Data (CD<sub>3</sub>CN)

| Proton | δ (ppm) | Multiplicity | # Protons | J (Hz)                              |
|--------|---------|--------------|-----------|-------------------------------------|
| a      | 2.44    | s            | 6         | --                                  |
| b      | 8.21    | s            | 1         | --                                  |
| c      | 8.37    | s            | 2         | --                                  |
| d      | 4.95    | t            | 2         | <sup>3</sup> J <sub>de</sub> = 5.46 |
| e      | 4.91    | t            | 2         | <sup>3</sup> J <sub>ed</sub> = 5.46 |
| f      | 8.32    | d            | 2         | <sup>3</sup> J <sub>fg</sub> = 7.04 |
| g      | 8.06    | d            | 2         | <sup>3</sup> J <sub>gf</sub> = 7.04 |
| h      | 7.81    | d            | 2         | <sup>3</sup> J <sub>hi</sub> = 8.86 |
| i      | 6.78    | d            | 2         | <sup>3</sup> J <sub>ih</sub> = 8.86 |
| j      | 6.21    | br s         | 1         | --                                  |
| k      | 4.62    | d            | 2         | <sup>3</sup> J <sub>kj</sub> = 5.21 |
| l      | 7.95    | s            | 2         | --                                  |
| m      | 7.92    | s            | 1         | --                                  |

### Synthesis of 5[OTf]<sub>3</sub>

Compound **2**[Br]<sub>2</sub> (0.240 g, 5.16 × 10<sup>-4</sup> mol), **DB24C8** (1.16 g, 2.58 × 10<sup>-3</sup> mol) and 9-bromomethylantracene (0.070 g, 2.58 × 10<sup>-4</sup> mol) were dissolved in a two layer CH<sub>3</sub>NO<sub>2</sub> (10 mL) and H<sub>2</sub>O (5 mL) solution to which NaOTf (0.300 g, 1.74 × 10<sup>-3</sup> mol) was added and stirred at room temperature for 7 days. The nitromethane layer was separated from the water layer, washed several times with water and dried with anhydrous MgSO<sub>4</sub>. The nitromethane was

evaporated and the residue washed several times with toluene to get rid of excess 9-bromomethylantracene and **DB24C8**. The rotaxane was further purified by column chromatography on silica gel using 7:2:1 MeOH: 2M NH<sub>4</sub>Cl: MeNO<sub>2</sub> as the eluent. The isolated solid was dissolved in CH<sub>3</sub>NO<sub>2</sub> and NaOTf added. The resulting solid was then washed with water numerous times. The product was isolated as a yellow solid. (*R<sub>f</sub>* = 0.81, 0.085 g, 27%), ESI-MS: *m/z* [5-OTf]<sup>+</sup> calc. 1092.4286, found 1092.4282.

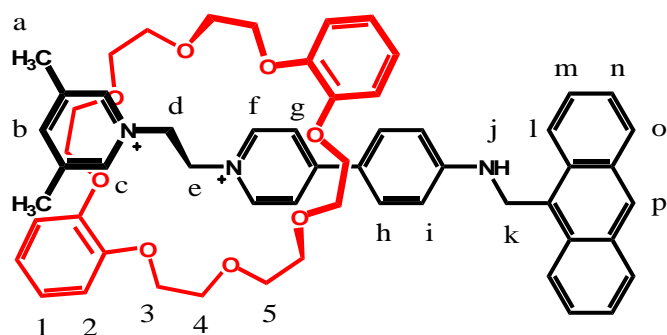

<sup>1</sup>H NMR Spectroscopic Data (CD<sub>3</sub>CN)

| Proton | δ (ppm) | Multiplicity | # Protons | J (Hz)                                                                                                           |
|--------|---------|--------------|-----------|------------------------------------------------------------------------------------------------------------------|
| a      | 2.16    | s            | 6         | --                                                                                                               |
| b      | 7.59    | s            | 1         | --                                                                                                               |
| c      | 8.57    | s            | 2         | --                                                                                                               |
| d      | 5.36    | m            | 2         | --                                                                                                               |
| e      | 5.28    | m            | 2         | --                                                                                                               |
| f      | 8.80    | d            | 2         | <sup>3</sup> J <sub>fg</sub> = 6.94                                                                              |
| g      | 7.88    | d            | 2         | <sup>3</sup> J <sub>gf</sub> = 6.94                                                                              |
| h      | 7.69    | d            | 2         | <sup>3</sup> J <sub>hi</sub> = 8.64                                                                              |
| i      | 6.95    | d            | 2         | <sup>3</sup> J <sub>ih</sub> = 8.64                                                                              |
| j      | 5.59    | t            | 1         | <sup>3</sup> J <sub>jk</sub> = 4.07                                                                              |
| k      | 5.33    | br s         | 2         | <sup>3</sup> J <sub>kj</sub> = 4.07                                                                              |
| l      | 8.14    | d            | 2         | <sup>3</sup> J <sub>lm</sub> = 8.51                                                                              |
| m      | 7.61    | ddd          | 2         | <sup>3</sup> J <sub>ml</sub> = 8.51. <sup>3</sup> J <sub>mn</sub> = 6.97,<br><sup>4</sup> J <sub>mo</sub> = 1.09 |

Supplementary Material (ESI) for Chemical Communications  
This journal is (c) The Royal Society of Chemistry 2007

|            |           |      |    |                                        |
|------------|-----------|------|----|----------------------------------------|
| <b>n</b>   | 7.56      | dd   | 2  | ${}^3J_{no} = 8.01, {}^3J_{nm} = 6.97$ |
| <b>o</b>   | 8.33      | d    | 2  | ${}^3J_{on} = 8.01$                    |
| <b>p</b>   | 8.63      | s    | 1  | --                                     |
| <b>1-2</b> | 6.76      | br s | 8  | --                                     |
| <b>3-5</b> | 3.79-4.06 | m    | 24 | --                                     |

---
